# Supplementary figures and images for: MicroRNA-145 and microRNA-486 are potential serum biomarkers for vascular calcification
Source: PubMed Central journal article supplement — Nephrol Dial Transplant. 2023 Jan 31;38(7):1729–40. doi: 10.1093/ndt/gfad027 (PMC10310514; doi:10.1093/ndt/gfad027), 2023-01-31

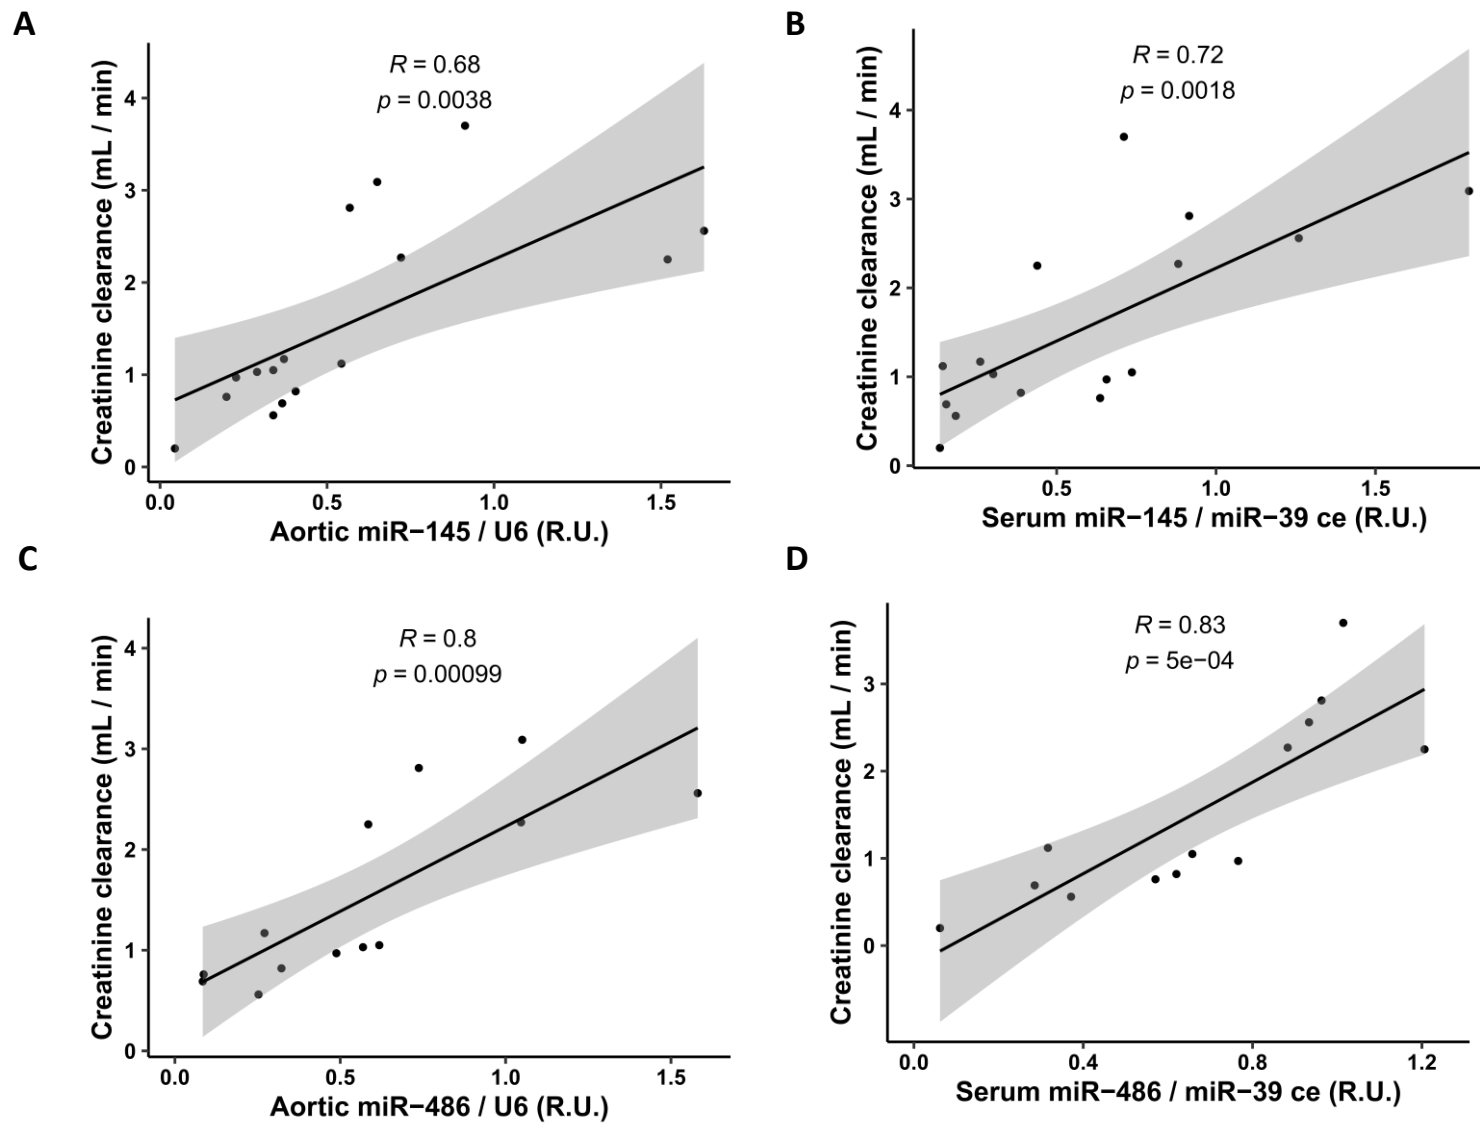

**SUPPLEMENTARY FIGURE 1**

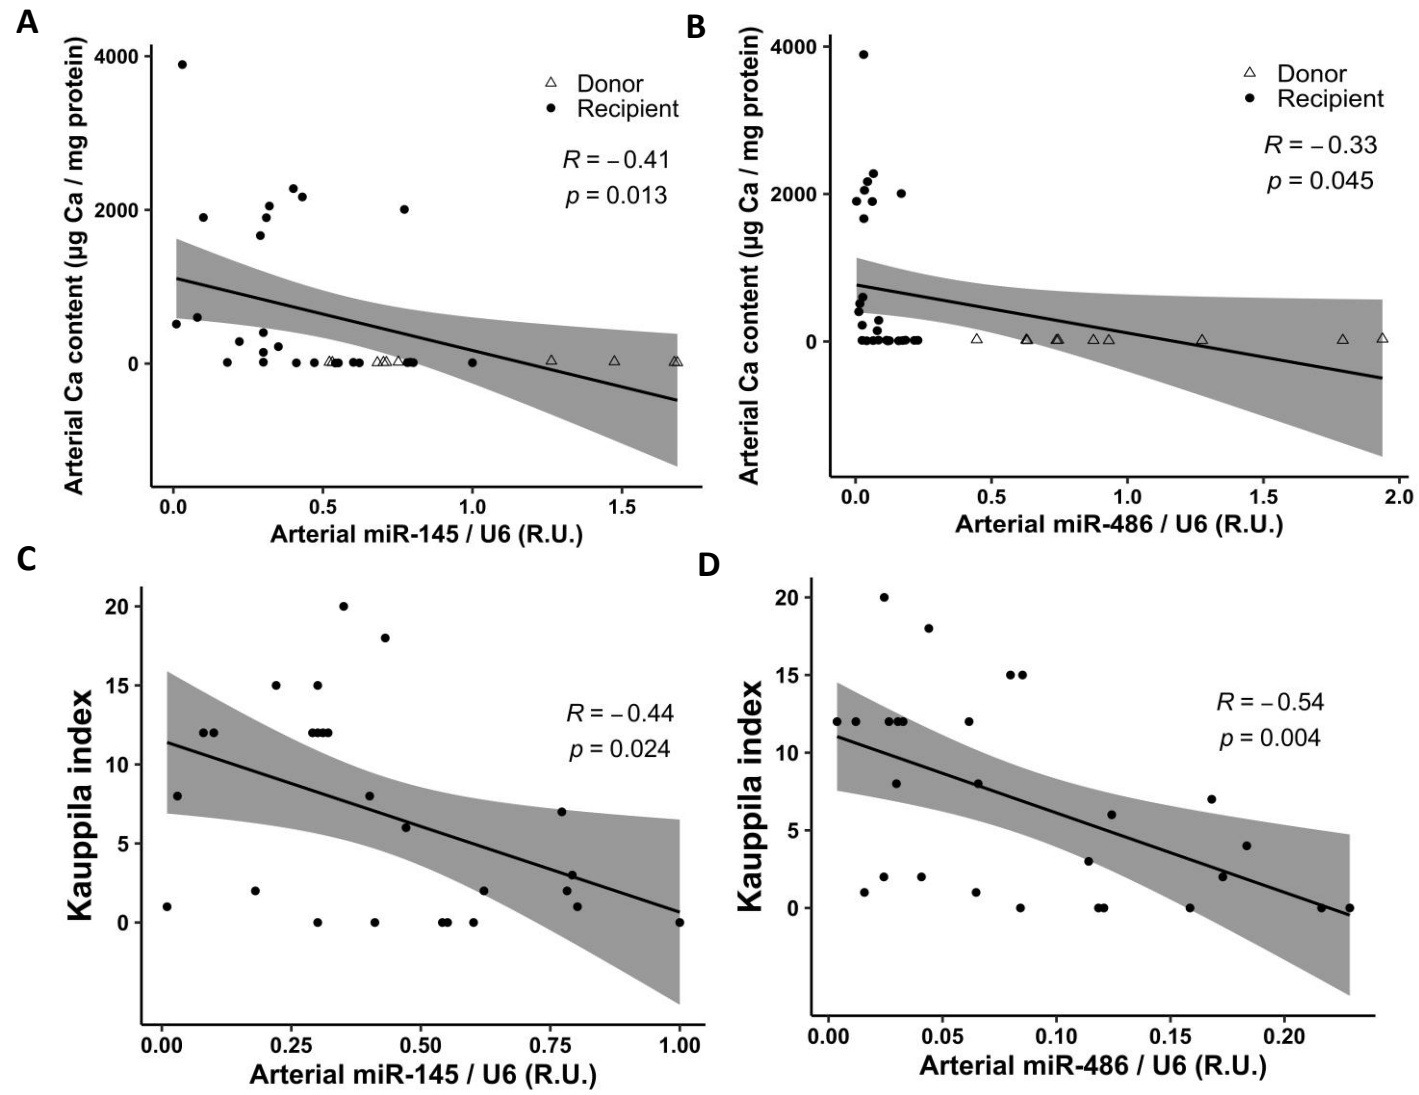

SUPPLEMENTARY FIGURE 2

A

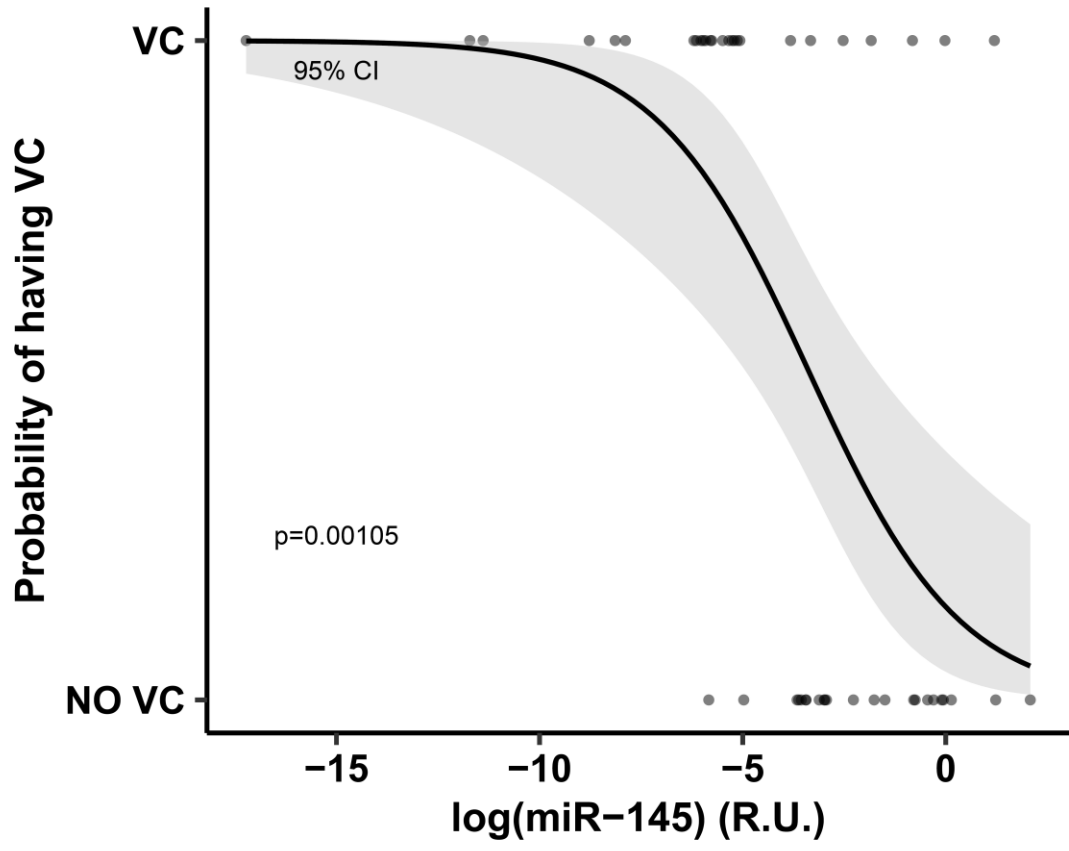

B

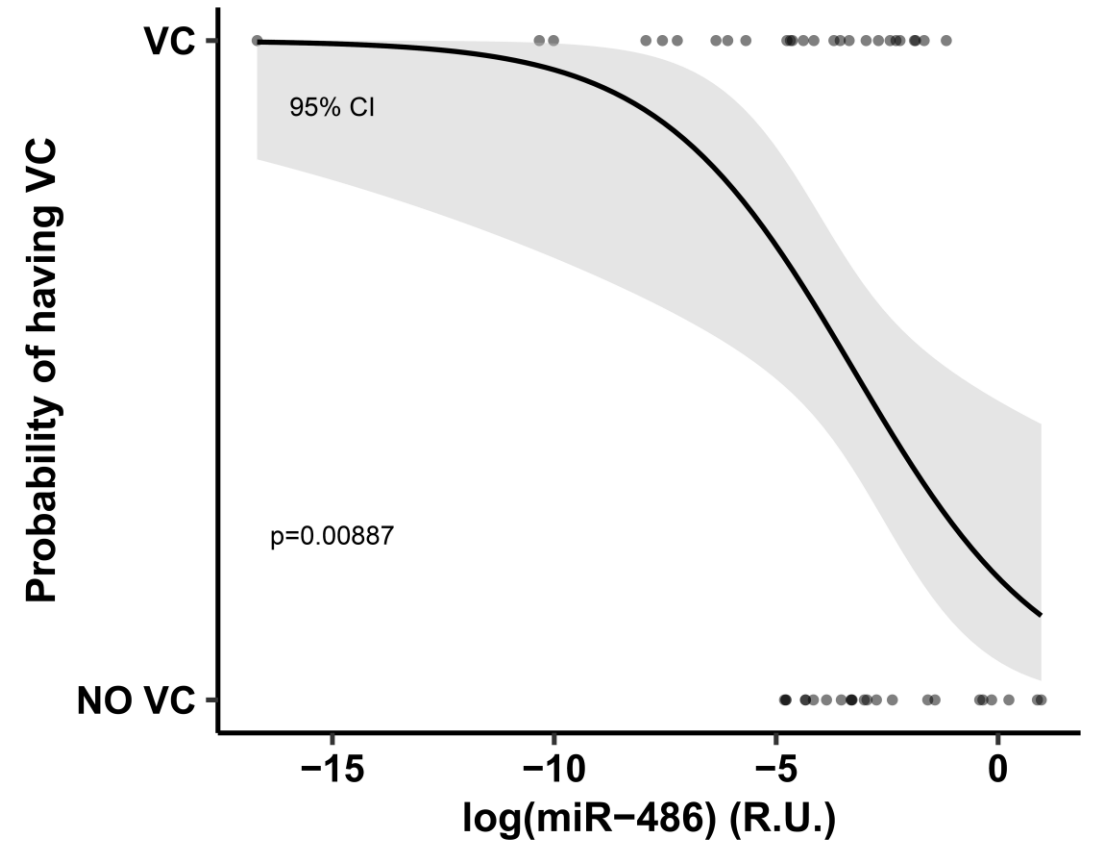

SUPPLEMENTARY FIGURE 3

Supplement: gfad027_supplemental_figures.pdf [file gfad027_supplemental_figures.pdf]
